# Supplementary material for: Cdc13 is predominant over Stn1 and Ten1 in preventing chromosome end fusions
Source: eLife. 2020 Aug 5;9:e53144. doi: 10.7554/eLife.53144 (PMC7406354; doi:10.7554/eLife.53144)
Supplement: Figure 1—source data 1. [file elife-53144-fig1-data1.xlsx]

## Sheet: Sheet1
Related to Figure 1D
	SY14-3rd			SY14-63rd
Hours	Repeat 1	Repeat 2	Repeat 3	Repeat 1	Repeat 2	Repeat 3
1	0.104	0.108	0.097	0.103	0.102	0.097
3	0.114	0.117	0.13	0.122	0.111	0.11
5	0.19	0.227	0.224	0.178	0.179	0.178
7	0.395	0.385	0.463	0.359	0.36	0.34
9	0.683	0.663	0.808	0.673	0.636	0.638
11	1.001	1	1.018	1.032	0.933	0.931
13	1.514	1.54	1.558	1.501	1.465	1.416
15	1.878	1.741	1.827	1.752	1.769	1.849
17	1.99	1.977	1.972	1.991	1.961	1.864
Related to Figure 1E
	SY15-3rd			SY15-63rd
Hours	Repeat 1	Repeat 2	Repeat 3	Repeat 1	Repeat 2	Repeat 3
1	0.101	0.105	0.095	0.094	0.1	0.101
2	0.102	0.109	0.103	0.114	0.1	0.12
4	0.178	0.171	0.161	0.162	0.155	0.173
6	0.192	0.212	0.182	0.168	0.209	0.188
8	0.332	0.312	0.287	0.27	0.321	0.325
10	0.539	0.475	0.493	0.441	0.498	0.431
12	0.812	0.692	0.626	0.627	0.625	0.783
14	1.186	1.121	1.01	1.095	0.916	0.969
16	1.491	1.456	1.379	1.347	1.431	1.396
18	1.888	1.906	1.904	1.747	1.8	1.92
20	1.941	1.937	1.93	1.957	1.895	1.974
