# Supplementary material for: Cdc13 is predominant over Stn1 and Ten1 in preventing chromosome end fusions
Source: eLife. 2020 Aug 5;9:e53144. doi: 10.7554/eLife.53144 (PMC7406354; doi:10.7554/eLife.53144)
Supplement: Figure 2—source data 1. [file elife-53144-fig2-data1.xlsx]

## Sheet: Sheet1
Related to Figure 2C
	SY15			SY15-cdc13Δ			SY15-stn1Δ			SY15-ten1Δ
Hours	Repeat 1	Repeat 2	Repeat 3	Repeat 1	Repeat 2	Repeat 3	Repeat 1	Repeat 2	Repeat 3	Repeat 1	Repeat 2	Repeat 3
1	0.1	0.102	0.098	0.098	0.106	0.106	0.11	0.104	0.104	0.098	0.099	0.102
2	0.107	0.1	0.1	0.1	0.131	0.105	0.08	0.114	0.123	0.098	0.114	0.11
4	0.163	0.176	0.165	0.177	0.178	0.162	0.15	0.141	0.163	0.154	0.166	0.139
6	0.174	0.202	0.187	0.211	0.241	0.227	0.189	0.199	0.212	0.15	0.206	0.193
8	0.306	0.342	0.322	0.301	0.343	0.318	0.306	0.28	0.334	0.281	0.331	0.333
10	0.439	0.51	0.526	0.519	0.496	0.413	0.43	0.444	0.524	0.497	0.511	0.531
12	0.714	0.722	0.757	0.731	0.748	0.703	0.708	0.671	0.801	0.67	0.802	0.78
14	1.081	1.17	1.155	1.28	1.259	1.068	1.094	0.961	1.255	0.915	1.245	1.289
16	1.525	1.52	1.516	1.51	1.416	1.318	1.408	1.338	1.537	1.259	1.575	1.559
18	1.799	1.743	1.837	1.788	1.854	1.694	1.731	1.673	1.778	1.608	1.797	1.909
20	1.901	1.969	1.992	1.999	1.991	1.892	1.959	1.84	1.903	1.824	1.967	1.954
