# Supplementary material for: Cdc13 is predominant over Stn1 and Ten1 in preventing chromosome end fusions
Source: eLife. 2020 Aug 5;9:e53144. doi: 10.7554/eLife.53144 (PMC7406354; doi:10.7554/eLife.53144)
Supplement: Figure 4—source data 1. [file elife-53144-fig4-data1.xlsx]

## Sheet: Sheet1
Related to Figure 4C
	Repeat 1	Repeat 2	Repeat 3
SY14-cdc13Δ	0.00099	0.00117	0.00153
SY14-cdc13Δ rad52Δ	2e-05	1e-05	3e-05
SY14-cdc13Δ yku70Δ	0.00084	0.00122	0.00139
Related to Figure 4E
	Repeat 1	Repeat 2	Repeat 3
SY14-cdc13Δ	0.00161	0.00152	0.00106
SY14-cdc13Δ pol32Δ	0.0004	0.00035	0.00054
