# Supplementary material for: Cdc13 is predominant over Stn1 and Ten1 in preventing chromosome end fusions
Source: eLife. 2020 Aug 5;9:e53144. doi: 10.7554/eLife.53144 (PMC7406354; doi:10.7554/eLife.53144)
Supplement: Figure 4—source data 2. [file elife-53144-fig4-data2.xlsx]

## Sheet: Sheet1
Related to Figure 4—figure supplement 4
	Repeat 1	Repeat 2	Repeat 3	Repeat 4
SY14	1	1	1	1
SY14-lig4Δ	0.055	0.3447	0.287	0.0833
SY14-yku70Δ	0.0605	0.2549	0.136	0.1088
