# Supplementary material for: Cdc13 is predominant over Stn1 and Ten1 in preventing chromosome end fusions
Source: eLife. 2020 Aug 5;9:e53144. doi: 10.7554/eLife.53144 (PMC7406354; doi:10.7554/eLife.53144)
Supplement: Figure 5—source data 1. [file elife-53144-fig5-data1.xlsx]

## Sheet: Sheet1
Related to Figure 5A
	Repeat 1	Repeat 2	Repeat 3
SY14-cdc13Δ	0.00089	0.00119	0.00135
SY14-stn1Δ	1e-05	5e-05	5e-05
SY14-ten1Δ	3e-05	5e-05	3e-05
Related to Figure 5C
	Repeat 1	Repeat 2	Repeat 3
SY14-cdc13Δ	0.00117	0.00203	0.00141
SY14-stn1Δ	3e-05	8e-05	1e-05
SY14-ten1Δ	4e-05	0.00011	6e-05
SY14-cdc13Δ stn1Δ	0.00029	0.0007	0.00017
SY14-cdc13Δ ten1Δ	0.00027	0.00046	0.00047
