# Supplementary material for: Cdc13 is predominant over Stn1 and Ten1 in preventing chromosome end fusions
Source: eLife. 2020 Aug 5;9:e53144. doi: 10.7554/eLife.53144 (PMC7406354; doi:10.7554/eLife.53144)
Supplement: Figure 6—source data 1. [file elife-53144-fig6-data1.xlsx]

## Sheet: Sheet1
Related to Figure 6A
Days	SY14	SY14 tlc1Δ-1	SY14 tlc1Δ-2	SY14 tlc1Δ-3	SY15	SY15 tlc1Δ
1	3.3637	3.9774	4.1241	3.9796	4.3624	4.182
2	3.5664	3.4327	3.3095	3.5495	3.4757	3.2119
3	3.5545	3.412	2.7471	3.495	3.6977	3.547
4	3.5405	3.3287	1.2409	3.2453	3.6493	3.7702
5	3.572	2.947	1.076	3.276	3.587	3.889
6	3.5171	1.5032	1.5251	2.6975	3.6172	3.7356
7	3.7579	3.5495	1.9465	3.0257	3.6893	3.921
8	3.7126	3.6702	0.6547	2.5776	3.6037	3.758
9	3.8133	3.4591	1.7888	2.1321	3.3643	3.7823
10	3.4667	3.4346	2.8825	1.8059	3.4677	3.7252
11	3.5154	3.5352	3.8591	2.9298	3.5647	3.9198
12	3.2731	3.3079	3.517	2.8318	3.2543	3.7725
13	3.493	3.3745	3.6976	3.3969	3.5028	3.5468
14	3.5316	3.3124	3.5671	3.3307	3.3435	3.637
15	3.3618	3.4475	3.3942	3.275	3.6567	3.4803
16	3.7799	3.6506	3.5913	3.2482	3.6731	3.4622
