# Supplementary material for: Cdc13 is predominant over Stn1 and Ten1 in preventing chromosome end fusions
Source: eLife. 2020 Aug 5;9:e53144. doi: 10.7554/eLife.53144 (PMC7406354; doi:10.7554/eLife.53144)
Supplement: Figure 7—source data 1. [file elife-53144-fig7-data1.xlsx]

## Sheet: Sheet1
Related to Figure 7A
Days	SY14	SY14-tlc1Δ-1	SY14-tlc1Δ-2	SY14-tlc1Δ rad52Δ-1	SY14-tlc1Δ rad52Δ-2
1	3.6815	3.5374	3.8683	3.4621	3.7008
2	2.9585	3.2473	3.2641	1.38	1.061
3	4.0907	3.8985	3.9207	1.7919	1.6207
4	3.1375	2.8266	3.1964	0.1051	0.0405
5	3.0971	1.5775	3.1584	0.0889	0.0756
6	3.5	1.1292	3.0532	0.1599	0.2067
7	3.4325	0.6517	1.6226	0.032	0.1832
8	3.2971	1.1591	2.8151	0.1919	0.2102
9	2.9875	1.5529	2.8681	1.5379	0.266
10	3.3416	3.0374	3.2563	2.8927	2.8367
11	3.0425	2.9363	2.9739	2.6767	2.781
12	3.3537	3.4442	3.262	2.7918	2.7375
13	3.2664	3.2183	3.2391	2.9875	2.9446
14	3.3487	3.4318	3.3185	2.9977	3.0062
15	3.6445	3.8482	3.5616	3.1192	3.2967
