# Supplementary material for: Cdc13 is predominant over Stn1 and Ten1 in preventing chromosome end fusions
Source: eLife. 2020 Aug 5;9:e53144. doi: 10.7554/eLife.53144 (PMC7406354; doi:10.7554/eLife.53144)
Supplement: Supplementary file 1. [file elife-53144-supp1.docx]

| **Supplementary file 1 Mapping primers used in this study** | | |
| --- | --- | --- |
| Primer name | Sequence | Source |
| 1L-F | CTCATGTACGTCTCCTCCAAGC | This study |
| 1L-R | CTGTCGATGCTGATAGGGCTGT | This study |
| 2L-F | CTCCTCAACTGTCGATGATGCC | This study |
| 2L-R | GCTAATGCCAGTACCAATGCGA | This study |
| 3L-F | TCGCATTGGTACTGGCATTAGC | This study |
| 3L-R | TGTCACTGACGGTAGCATGCGA | This study |
| 4L-F | CAGAGGGTGTGTCTGCCATGTA | This study |
| 4L-R | GGCACTGCGTAGGTAGCAGATT | This study |
| 5L-F | CGTCAAGCGTCTTAAGTCGAGGC | This study |
| 5L-R | CACGAAGTAGCGCAGGAAACCG | This study |
| 6L-F | CCGACCATGACGGAAACGACAA | This study |
| 6L-R | GCGGCTGAGCAACGAACAGAAT | This study |
| 7L-F | GCGCTTCGAAGTAGAGGAGCC | This study |
| 7L-R | GGAGAGGTAGGGTAATGGAGGG | This study |
| 8L-F | ACCATCCACCGCCCATCATAAC | This study |
| 8L-R | CTGAAGTGGCATCCGTTCAAGC | This study |
| 9L-F | GCTCACACACATGTGGGCGCTA | This study |
| 9L-R | TCCAGCTGAACAAGTCACCA | This study |
| 10L-F | CTGGAGCAGCGGCAACACCG | This study |
| 10L-R | TGGCATTCTCACATTCGGCGCA | This study |
| 11L-F | CCGTGCCTGTGATACTTCCT | This study |
| 11L-R | GCGTATCGAAGAGGAACTGG | This study |
| 12L-F | TGACCACATCTTAAACCAACG | This study |
| 12L-R | CCCGATATTGACACTGCCGA | This study |
| 13L-F | CCAGCGGAAGGTCCATATTGCT | This study |
| 13L-R | CAGCCAAATCCACCAGTCTCAG | This study |
| 14L-F | GGTGTGATCGCTGCCATCTGTC | This study |
| 14L-R | GTGCTACCGACCTGCCGTTTTC | This study |
| 15L-F | GTGCGTACGCGAGTTTATCCA | This study |
| 15L-R | CGAGCGTGTAATGCTCTGATG | This study |
| 16L-F | GAGCCACCAGACGCTAAATA | This study |
| 16L-R | CGCTCCACTATCGATGGTTT | This study |
| 17L-F | CTCCGACAACGCTGACAGCA | This study |
| 17L-R | TTATAGAGCAGCACGGGACC | This study |
| 18L-F | TGGTGCCATTGCCGAACCTC | This study |
| 18L-R | AAGCAGCGGCAGTGAACTAC | This study |
| 19L-F | GATTCTGGAGGTTCAAATAA | This study |
| 19L-R | TAATTGCTTATTGATGACCA | This study |
| 20L-F | GTACTACGACTACCAGGAAC | This study |
| 20L-R | CGCAACTAGCATACATTTAT | This study |
| 21L-F | TTCTTGCTGTATTCACGAGC | This study |
| 21L-R | TTAGTAGGTCGAGACCAGAA | This study |
| 22L-F | TTCAGCAGTAACACGCTGGA | This study |
| 22L-R | GCGAATATAGCTTGTAACCA | This study |
| 23L-F | TTGCATAGACATCGCTGTCG | This study |
| 23L-R | ACCAAATGCACCACTAATCC | This study |
| 24L-F | ATCATTCTTCACCTGGTTCT | This study |
| 24L-R | TCAATATTTCTGCGCCAGCA | This study |
| 25L-F | GGATGAGAGTATCCTGTCTA | This study |
| 25L-R | TCATCTGTGGTATTGCAATG | This study |
| 26L-F | GAGATTGATGTCATTGACAT | This study |
| 26L-R | AGCGAATCTGACCATTGTAT | This study |
| 27L-F | CGATTGTGAATTCGGATAGC | This study |
| 27L-R | GGTTCAGAAGCTGCAGTGCC | This study |
| 28L-F | CTTCTCTGCCTTCAGCCTCT | This study |
| 28L-R | GGTATATGTCAACCCATAAG | This study |
| 29L-F | CCTTGGCCATGATGGATCAGT | This study |
| 29L-R | TAGTAAGCCATGGCTCCAAC | This study |
| 30L-F | ATTTACCCTAGAACAACTAG | This study |
| 30L-R | TTAATGACCTGAGGCTGCTT | This study |
| 1R-R | ACACCACACTACCCTAACAC | This study |
| 1R-F | TAGCATCCGTGTGCATATGC | This study |
| 2R-R | ATTCCACTCCATCACCCATC | This study |
| 2R-F | GGGTGAAGTAAAAGCGTCTG | This study |
| 3R-R | GACTTTCTCGTAAGCGTTCC | This study |
| 3R-F | GGGACAATTGCGCTTCTTTA | This study |
| 4R-R | ATGAGAACGCCCTTCTGGAC | This study |
| 4R-F | CGTTATGCCCGAAGTGTATC | This study |
| 5R-R | CGGGAGCTACCGTTGAAAAG | This study |
| 5R-F | GGAAGTCACTGACGAGGGTT | This study |
| 6R-R | CAGCCAGAACCTGTCCGTAAAC | This study |
| 6R-F | CGCTCTTGTATCCGGACTGAAC | This study |
| 7R-R | GGCTGTGGTTGACCTACCAGAA | This study |
| 7R-F | GATGTACGAAGTGAGTGCCCAG | This study |
| 8R-R | TATACGGGAGAGTTGCTCTC | This study |
| 8R-F | GTTGCTATTGAACCTGGTGT | This study |
| 9R-R | CCACAACCTGTCCGCTTGATTC | This study |
| 9R-F | GGTAGCAGGCATGAAGGAATCG | This study |
| 10R-R | CCCATCTTCATCACCACTCCGT | This study |
| 10R-F | CCTCGAAAGGTGCAGGTAATGC | This study |
| 11R-R | GCCATCATTGAAGCCGCTCC | This study |
| 11R-F | CGCAGAGGCACAATTTAGCA | This study |
| 12R-R | GCAGGCTAGCTGCATATTCA | This study |
| 12R-F | AGACTGTAACGCCTTGTTGC | This study |
| 13R-R | ATGTGTGTTCATGGCTCTTCT | This study |
| 13R-F | GTGACTACACCTATGCCTAAG | This study |
| 14R-R | CATGGCCGTGCTAGCAGTAACA | This study |
| 14R-F | GTCGACTTGTCCTGCCTCATAC | This study |
| 15R-R | GTACCGTGCTTAGAACTGGCTC | This study |
| 15R-F | CTCTGGAGTGTCCTTTCCCAGT | This study |
| 16R-R | CCACCATGGATATTGTGCTG | This study |
| 16R-F | CATCCACTTCCCCATAGTGC | This study |
| 17R-R | GGCCAACGCCGTATACTAAC | This study |
| 17R-F | GCCCTACATGCACAACAAAT | This study |
| 18R-R | AATGGAAGACATATCGGCCTACGG | This study |
| 18R-F | CAGTAGACACTGGGTCACTTGG | This study |
| 19R-R | ATGTTTCTGACATCAGAGCC | This study |
| 19R-F | GCGGTAGAAATGGTAGAAGT | This study |
| 20R-R | CTAGTGCCTCTGCATCCTCT | This study |
| 20R-F | CACTGAAAGTAGACCCGAAG | This study |
| 21R-R | CAGTAAAGCAACCACTTCCGCAG | This study |
| 21R-F | AGTAGACGACTCTGGAGAGGAAC | This study |
| 22R-R | CTGAGCGGACTTCTTCCTTA | This study |
| 22R-F | AGCCGAGGAGGCTTTTGGAA | This study |
| 23R-R | GGTACCGCTATCGTTGCTGT | This study |
| 23R-F | CATTCGTCATCGCCGCATCA | This study |
| 24R-R | ACCCGTTCCGACAACGACAA | This study |
| 24R-F | GCTACGACTGTTGAAATCGT | This study |
| 25R-R | AAGGGCAAACAGGCCTGAGGTA | This study |
| 25R-F | AGGTGGAAGAAGCCTCTGTGGT | This study |
| 26R-R | CACATCCTGTGAACGGTTACGC | This study |
| 26R-F | CTGGCCTATCGGTATCAAGGAC | This study |
| 27R-R | CAATCGCAGCAGTACCAGAACC | This study |
| 27R-F | GTCTTTAGACCCTTCCGCGGTG | This study |
| 28R-R | GGGTGCCAAGGTCATATCGT | This study |
| 28R-F | GACAGGCTTCAGGGCAATCT | This study |
| 29R-R | TCGCTCTAGGATGACTTTGG | This study |
| 29R-F | GCCGCTGCTACTTTCAACTG | This study |
| 30R-R | GGCAAGTCCTGTTCTGTGTGGT | This study |
| 30R-F | CGGTTCTAACCTTACCGTCCAC | This study |
| 31R-R | CTGGTGGTCGTAACTTGGGTCG | This study |
| 31R-F | AAGATCTCGGCGTCGGTTCTGA | This study |
| 32R-R | CCCTAGTGACCAGCTTGGATGT | This study |
| 32R-F | GGGCACAGACATCTGTACTTCTG | This study |
| 33R-R | CCACCTTCCACTAAGGACGTAGA | This study |
| 33R-F | CGTCACCGTTGGTCCAGAACGA | This study |
| 34R-R | TCGCGTGCTTATTCTCAGGAGC | This study |
| 34R-F | TGAGCGTGCAGTAGCAGGTGTT | This study |
| 35R-R | AGGGTCTACGCGGTCCATAATC | This study |
| 35R-F | GACCTGCCTTGCTACCGTCTAT | This study |
